# Supplementary material for: Development of pH sensitive polyurethane–alginate nanoparticles for safe and efficient oral insulin delivery in animal models
Source: Royal Society of Chemistry journal article supplement (doi:10.1039/c6ra06749b), 2016-01-01
Supplement: c6ra06749b1.pdf [file c6ra06749b1.pdf]

**Development of pH sensitive Polyurethane-Alginate nanoparticles for safe  
and efficient oral insulin delivery in animal model**

Aditi Bhattacharyya<sup>a</sup>, Debarati Mukherjee<sup>b</sup>, Roshnara Mishra<sup>b</sup>, P.P. Kundu<sup>a,\*</sup>

**Absorbance**

**Insulin concentration**

**Figure S1. Calibration curve of insulin for Lowry's assay**

**LOQ is 0.1088**

**Absorbance**

**Insulin concentration  
( $\mu$ IU/ml)**

**Figure S2. Calibration curve of insulin for ELISA**

**LOQ: 10.48**
